# Supplementary material for: The non-catalytic role of DNA polymerase epsilon in replication initiation in human cells
Source: PubMed Central journal article supplement (PMC9675812; doi:10.1038/s41467-022-34911-4), 2022-11-19
Supplement: 41467_2022_34911_MOESM3_ESM.pdf [file 41467_2022_34911_MOESM3_ESM.pdf]

## **Description of Additional Supplementary Files**

File Name: Supplementary Data 1

Description: Summary of the iPOND data
